# Supplementary material for: Gene expression meta-analysis reveals immune response convergence on the IFNγ-STAT1-IRF1 axis and adaptive immune resistance mechanisms in lymphoma
Source: PubMed Central journal article supplement (PMC4566848; doi:10.1186/s13073-015-0218-3), 2015-09-11

# Outline: Meta-profile generation

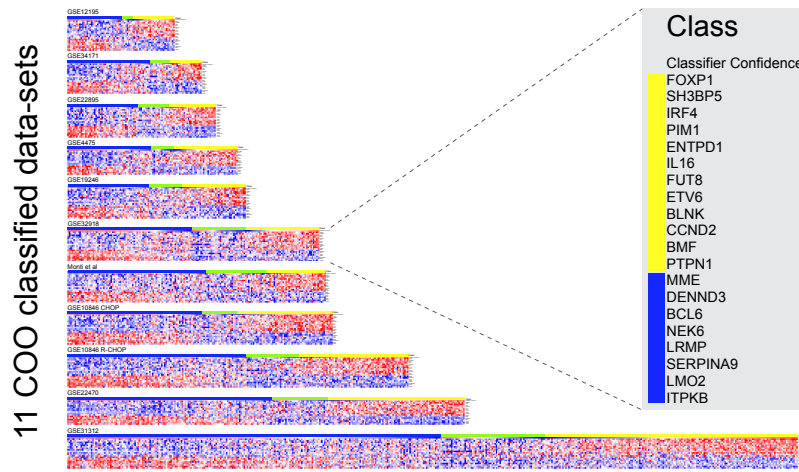

Per data-set

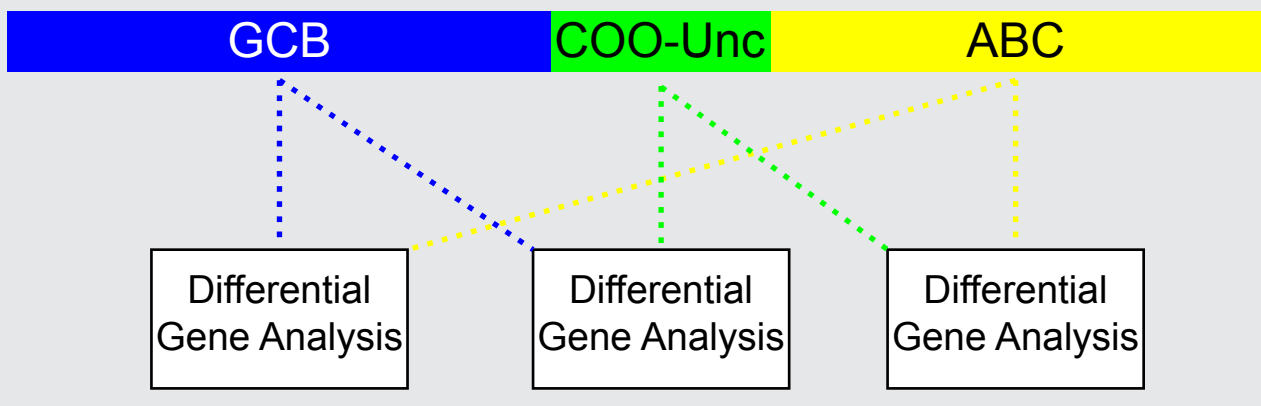

Across data sets / per comparison

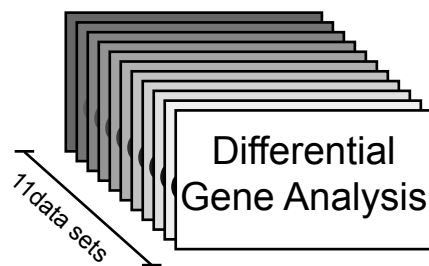

Merge results:

- Consider genes with adjusted p-val < 0.05
- Normalise fold changes per data set (NormFC)
- Find number of data sets each gene is differentially expressed in (NumDataSets)
- Rank genes by NumDataSets then NormFC

Enriched >= 6 Data sets

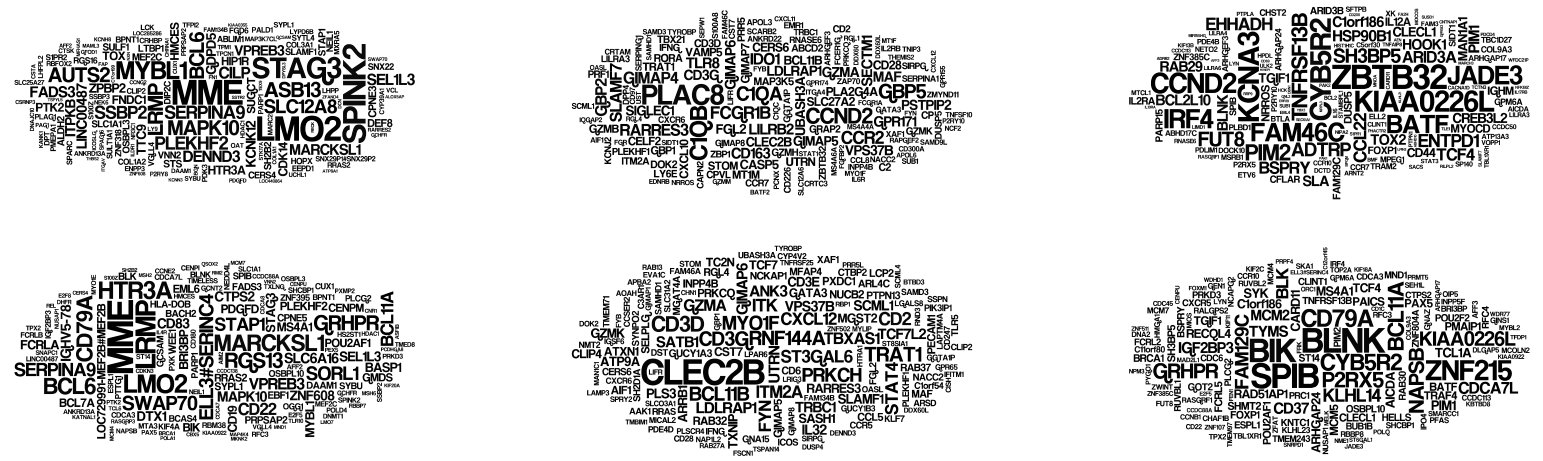

Supplement: 13073_2015_218_MOESM1_ESM.pdf [file 13073_2015_218_MOESM1_ESM.pdf]
