# Supplementary material for: Gene expression meta-analysis reveals immune response convergence on the IFNγ-STAT1-IRF1 axis and adaptive immune resistance mechanisms in lymphoma
Source: PubMed Central journal article supplement (PMC4566848; doi:10.1186/s13073-015-0218-3), 2015-09-11

# Outline: Focus gene analysis

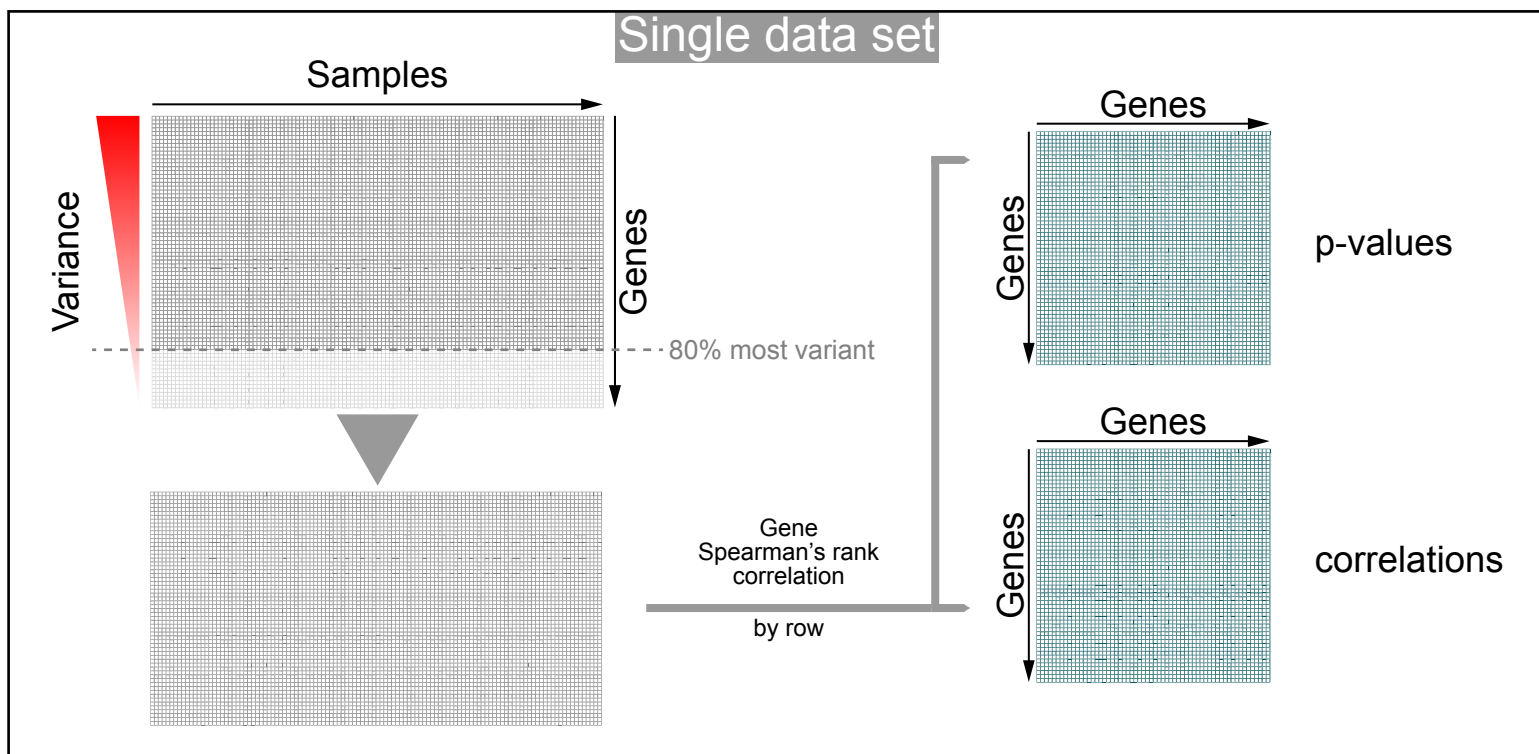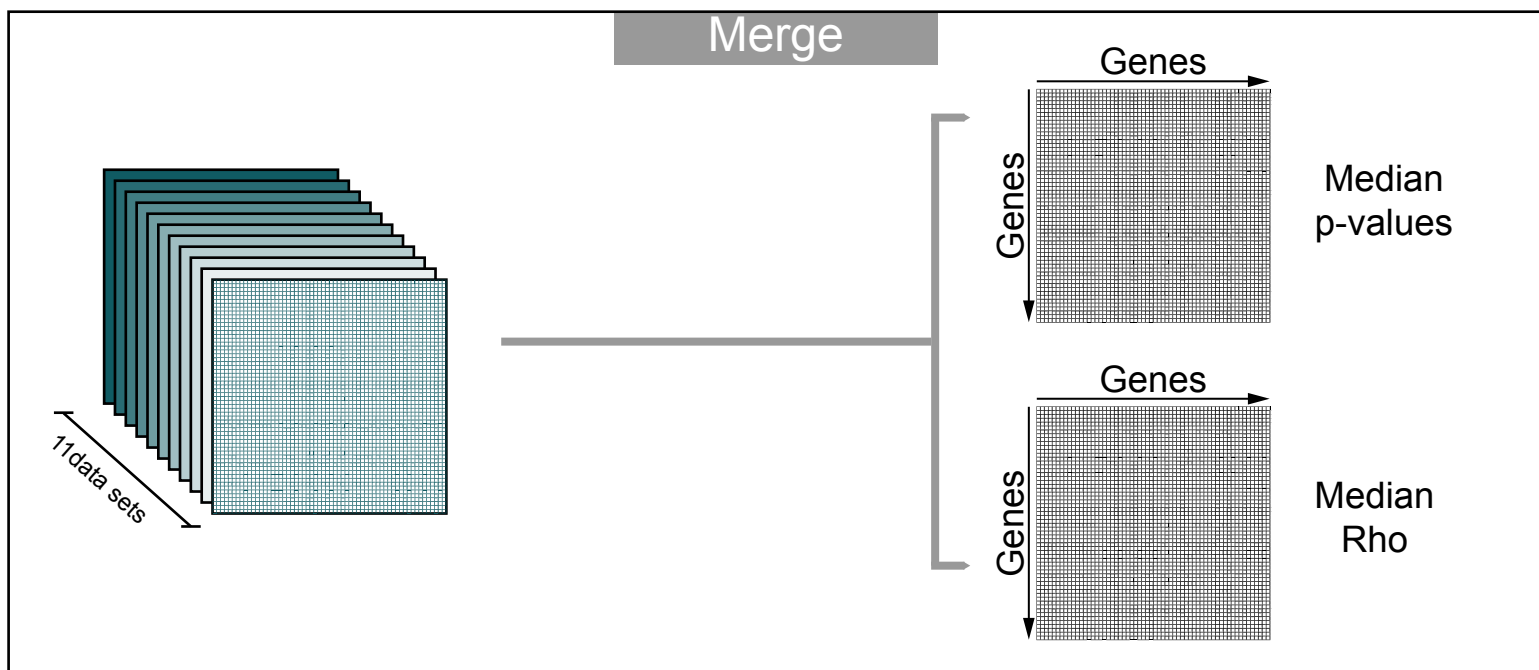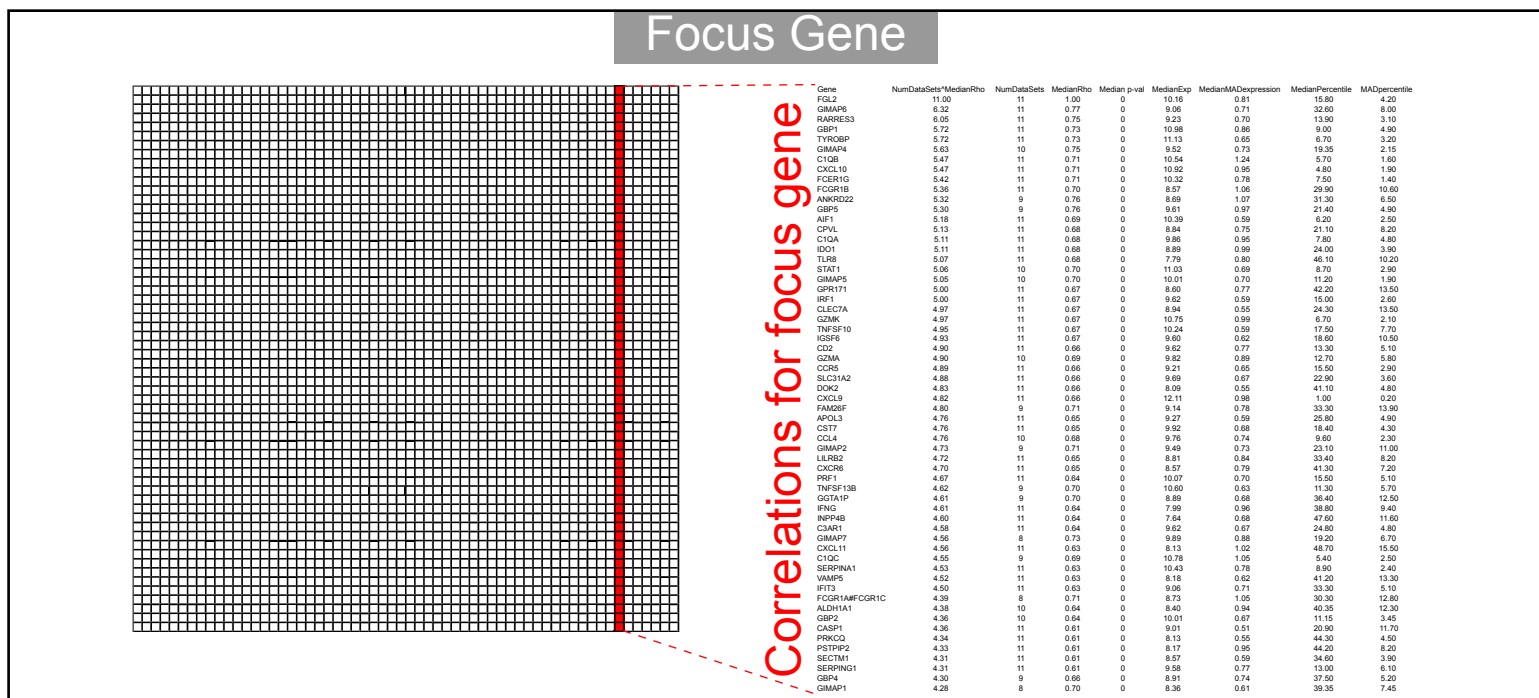

Supplement: 13073_2015_218_MOESM3_ESM.pdf [file 13073_2015_218_MOESM3_ESM.pdf]
