# Supplementary material for: Gene expression meta-analysis reveals immune response convergence on the IFNγ-STAT1-IRF1 axis and adaptive immune resistance mechanisms in lymphoma
Source: PubMed Central journal article supplement (PMC4566848; doi:10.1186/s13073-015-0218-3), 2015-09-11
Supplement: 13073_2015_218_MOESM10_ESM.pdf [file 13073_2015_218_MOESM10_ESM.pdf]

global  
-0.2564 0.20 0.80 1

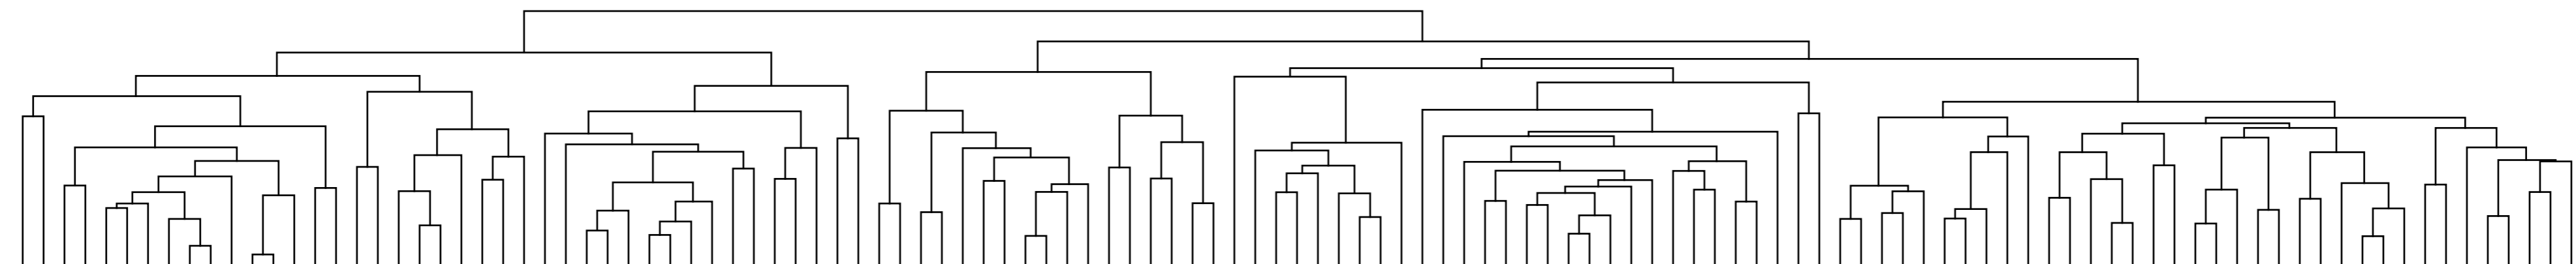

AAK1  
CYLD  
ARL4C  
GIMAP6  
CD6  
ITM2A  
IL32  
BCL11B  
INPP4B  
UBASH3A  
LDLRAP1  
CCSER2  
TNIK  
MAF  
STAT4  
TNFRSF25  
FYB  
LCP2  
CST7  
GZMA  
GZMK  
GPR65  
CLEC2B  
STOM  
RARRS3  
GATA3  
FYN  
CD28  
CD3E  
PRKCQ  
CD3D  
CD3G  
TRBC1  
TRAT1  
CD2  
SIRPG  
GIMAP5  
LGALS8  
IL15  
GIMAP1  
TCF7  
CALCOCO2  
RALB  
EIF4E3  
LIFR  
HLA-E  
CCR5  
CXCR6  
GBP1  
IFITM1  
OASL  
XAF1  
CXCL12  
CXCR3  
DDX58  
TNFRSF1A  
IFNG  
TNFRSF14  
FGR  
CD63  
ATP2B4  
DOK2  
RAB27A  
ARRB1  
PLA2G4A  
SLC8A1  
PECAM1  
C3AR1  
C1ORF54  
CASP1  
AIF1  
LST1  
CEBPD  
FGL2  
AOAH  
TBXAS1  
SLC31A2  
SAT1  
TYROBP  
CPD  
FAM105A  
GALC  
NACC2  
WDFY3  
MYO1F  
LPAR6  
SAMHD1  
ATXN1  
PRR5L  
DNAJC1  
PPP2R2B  
NPC1  
ATP9A  
PTPN13  
LPCAT2  
MAN1C1  
RBM51  
ARSD  
SAMD3  
CERS6  
GIMAP8  
PXYLP1  
NAP1L2  
SCML1  
CPNE8  
FAM46A  
SLFN5  
OSBPL1A  
SPG20  
LRRC8C  
SEPW1  
GGTA1P  
KLF3  
VPS37B  
UTRN  
DDX60L  
SASH1  
PRR5  
NMT2  
TC2N  
PLEKHF1  
TMPRSS3  
SLC35D2

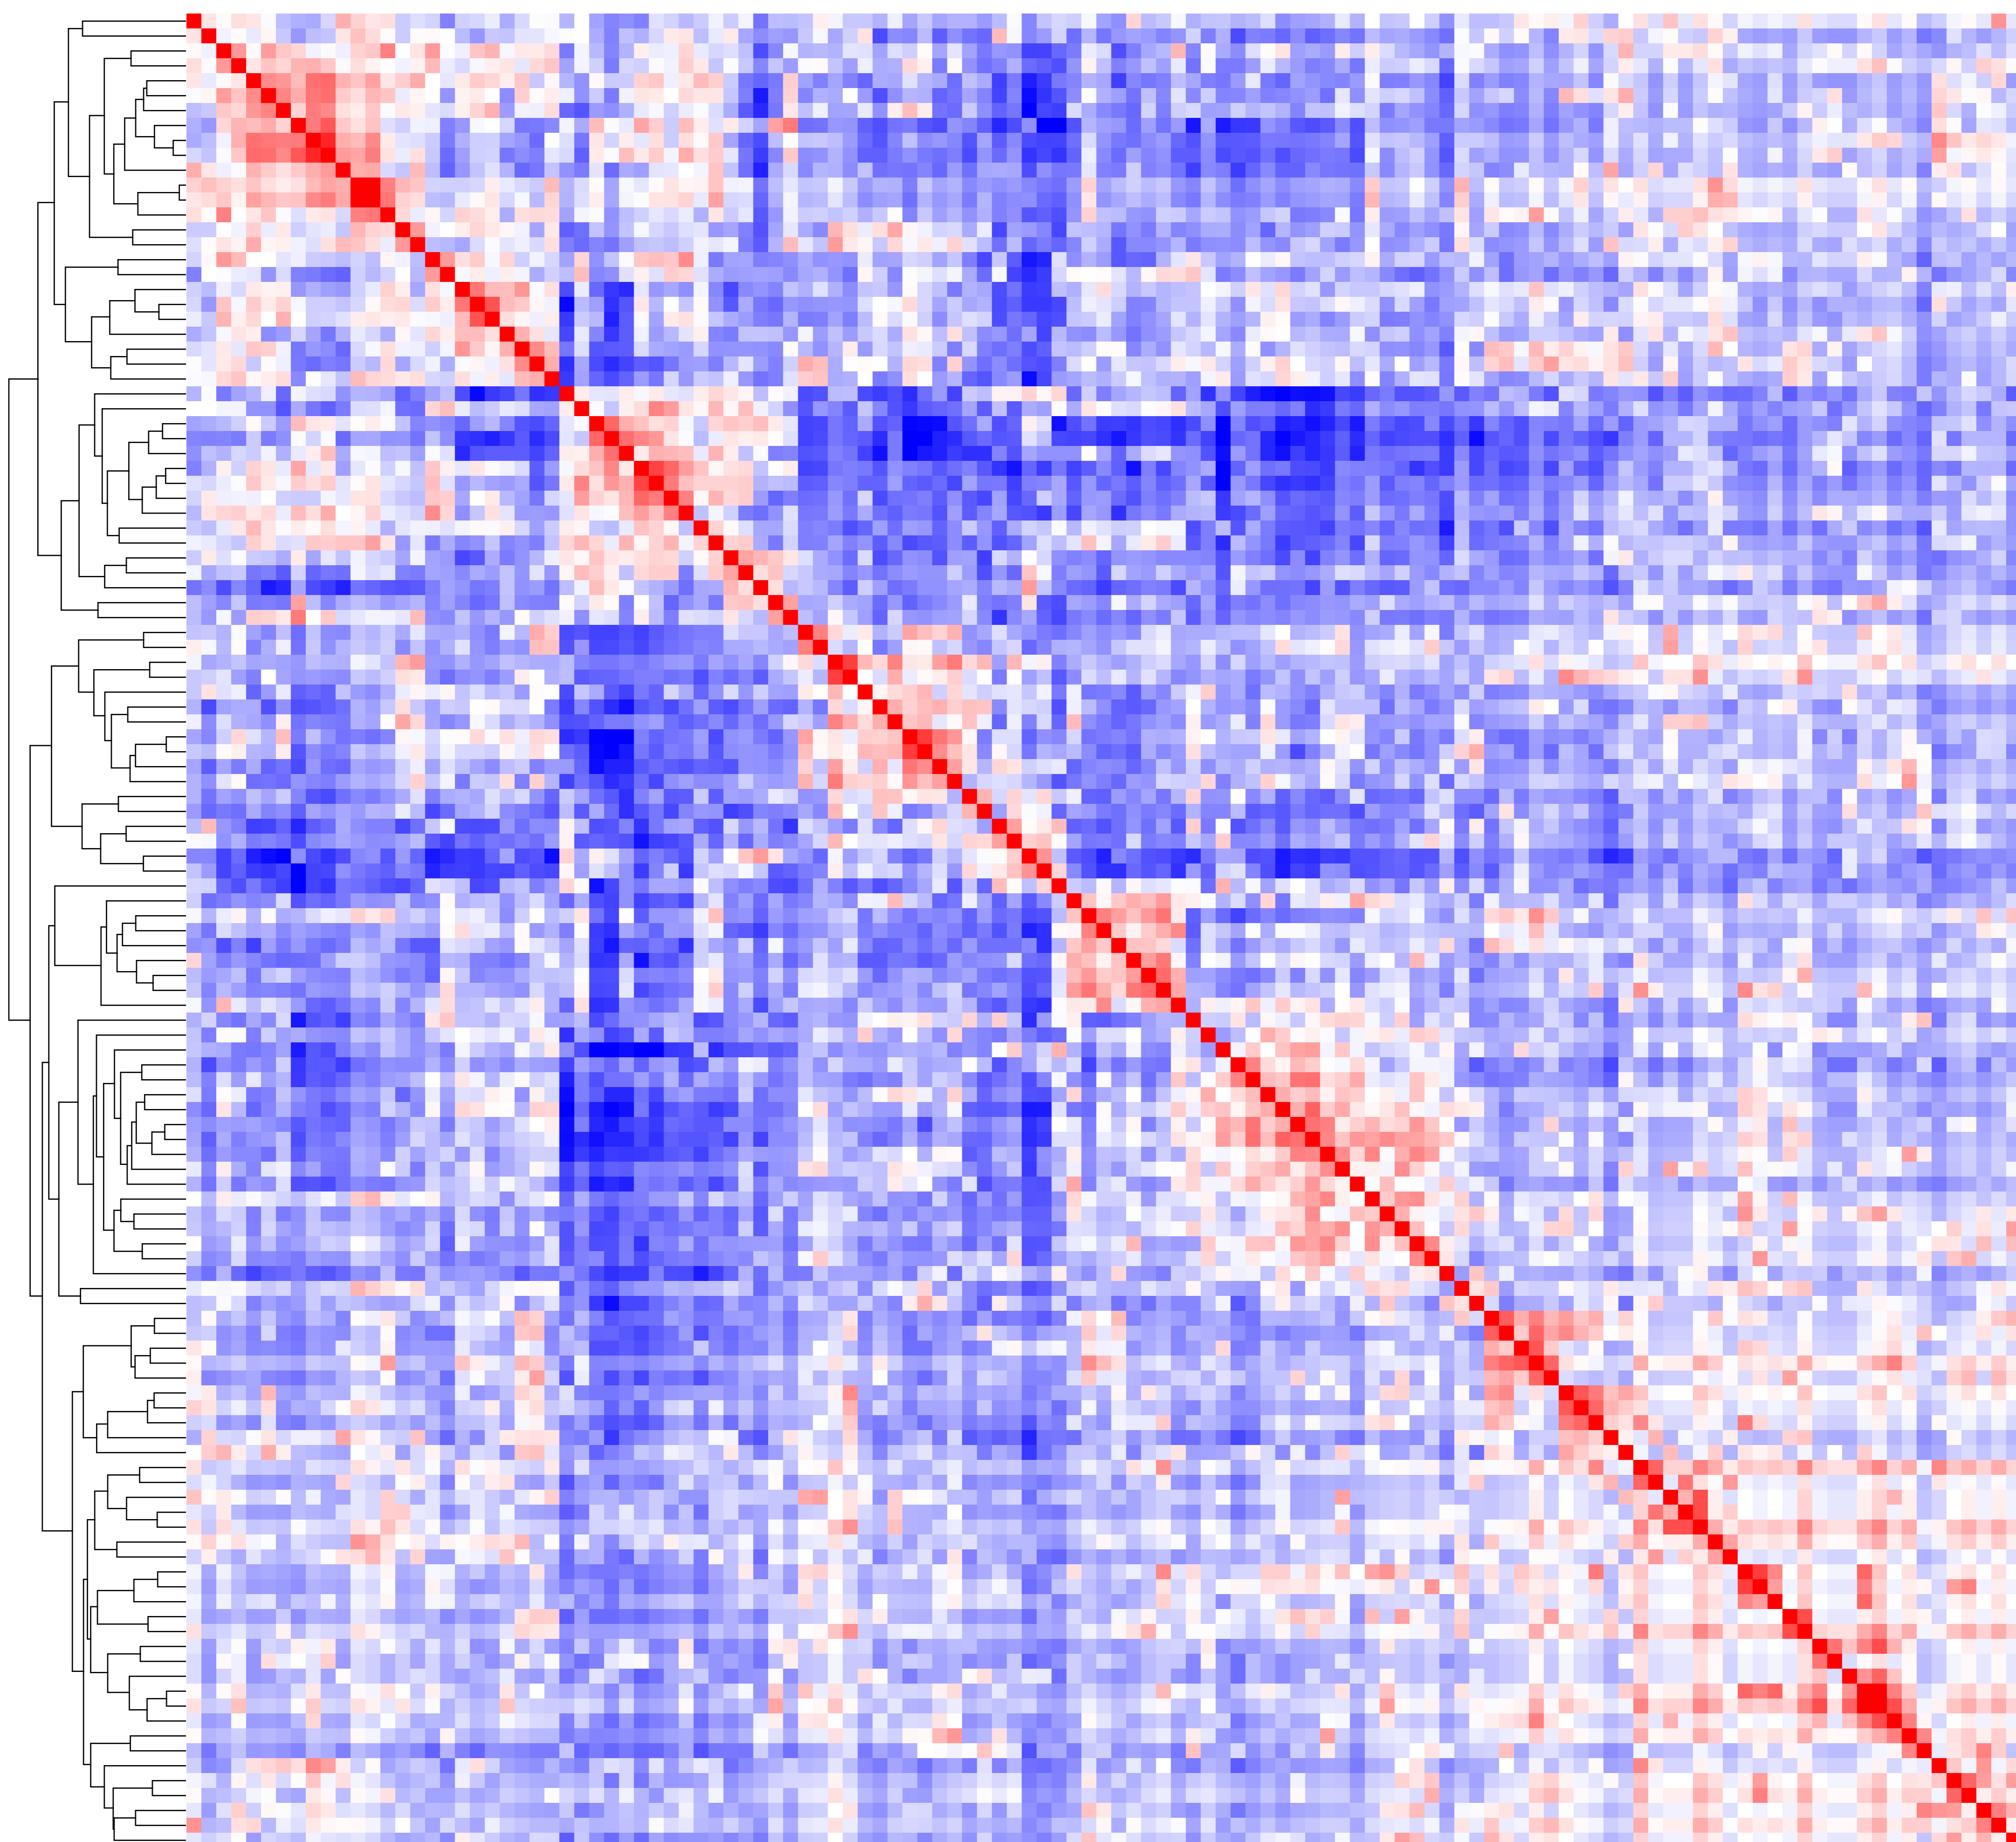

Gene  
AAK1  
CYLD  
ARL4C  
GIMAP6  
CD6  
ITM2A  
IL32  
BCL11B  
INPP4B  
UBASH3A  
LDLRAP1  
CCSER2  
TNIK  
MAF  
STAT4  
TNFRSF25  
FYB  
LCP2  
CST7  
GZMA  
GZMK  
GPR65  
CLEC2B  
STOM  
RARRS3  
GATA3  
FYN  
CD28  
CD3E  
PRKCQ  
CD3D  
CD3G  
TRBC1  
TRAT1  
CD2  
SIRPG  
GIMAP5  
LGALS8  
IL15  
GIMAP1  
TCF7  
CALCOCO2  
RALB  
EIF4E3  
LIFR  
HLA-E  
CCR5  
CXCR6  
GBP1  
IFITM1  
OASL  
XAF1  
CXCL12  
CXCR3  
DDX58  
TNFRSF1A  
IFNG  
TNFRSF14  
FGR  
CD63  
ATP2B4  
DOK2  
RAB27A  
ARRB1  
PLA2G4A  
SLC8A1  
PECAM1  
C3AR1  
C1ORF54  
CASP1  
AIF1  
LST1  
CEBPD  
FGL2  
AOAH  
TBXAS1  
SLC31A2  
SAT1  
TYROBP  
CPD  
FAM105A  
GALC  
NACC2  
WDFY3  
MYO1F  
LPAR6  
SAMHD1  
ATXN1  
PRR5L  
DNAJC1  
PPP2R2B  
NPC1  
ATP9A  
PTPN13  
LPCAT2  
MAN1C1  
RBM51  
ARSD  
SAMD3  
CERS6  
GIMAP8  
PXYLP1  
NAP1L2  
SCML1  
CPNE8  
FAM46A  
SLFN5  
OSBPL1A  
SPG20  
LRRC8C  
SEPW1  
GGTA1P  
KLF3  
VPS37B  
UTRN  
DDX60L  
SASH1  
PRR5  
NMT2  
TC2N  
PLEKHF1  
TMPRSS3  
SLC35D2
