# Supplementary material for: Gene expression meta-analysis reveals immune response convergence on the IFNγ-STAT1-IRF1 axis and adaptive immune resistance mechanisms in lymphoma
Source: PubMed Central journal article supplement (PMC4566848; doi:10.1186/s13073-015-0218-3), 2015-09-11
Supplement: 13073_2015_218_MOESM14_ESM.pdf [file 13073_2015_218_MOESM14_ESM.pdf]

GSE12195

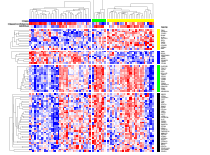

GSE34171

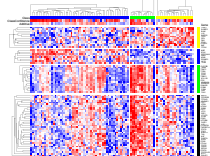

GSE22895

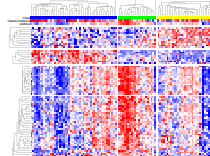

GSE4475

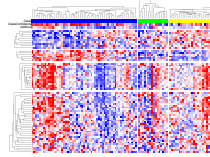

GSE19246

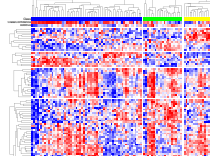

GSE32918

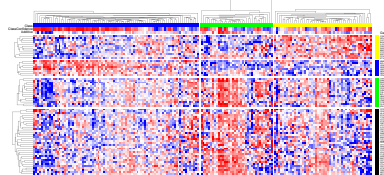

Monti et al

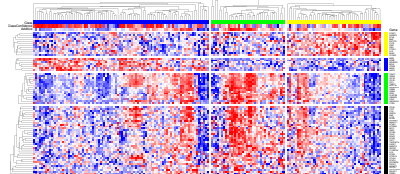

GSE10846 CHOP

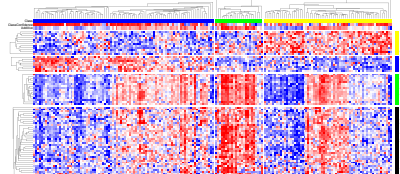

GSE10846 R-CHOP

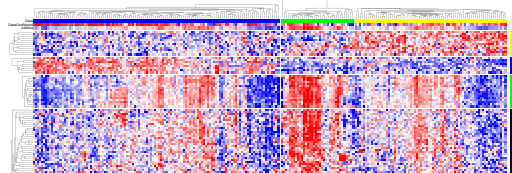

GSE22470

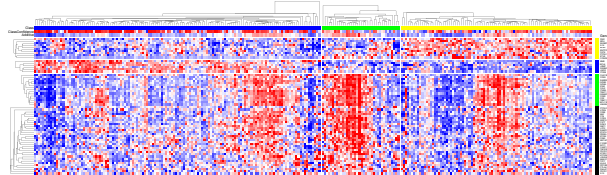

GSE31312

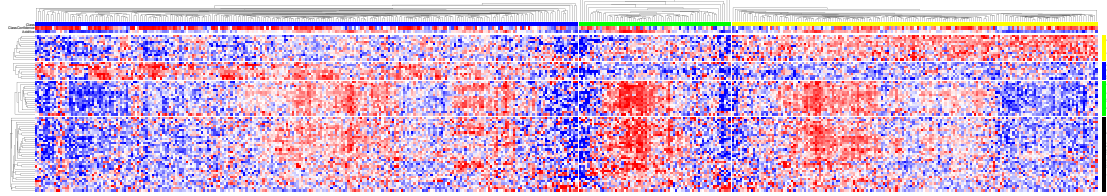

### Gene

- IRF4
- PIM1
- FOXP1
- SH3BP5
- BLNK
- IL16
- BMF
- ENTPD1
- FUT8
- ETV6
- CCND2
- PTPN1
- NEK6
- DENND3
- LMO2
- MME
- SERPINA9
- BCL6
- LRMP
- ITPKB
- CLEC2B
- RARRES3
- GZMK
- GZMA
- IFNG
- FGL2
- TRAT1
- ITM2A
- CD3G
- CD3D
- CD2
- TRBC1
- GIMAP6
- BCL11B
- UBASH3A
- TC2N
- SIRPG
- UTRN
- TCF7
- MAF
- MAN1C1
- LDLRAP1
- FYN
- HLA-E
- ATP2B4
- GBP1
- CCR5
- CST7
- LCP2
- DOK2
- RAB27A
- STOM
- CD63
- LPCAT2
- STAT4
- TNFRSF14
- CD274
- PDCD1LG2
- CASP1
- IL15
- C10RF54
- SEPW1
- PPP2R2B
- CD28
- CTLA4
- ATXN1
- PTPN13
- DNAJC1
- PRR5L
- NPC1
- PDCD1
