# Supplementary material for: Gene expression meta-analysis reveals immune response convergence on the IFNγ-STAT1-IRF1 axis and adaptive immune resistance mechanisms in lymphoma
Source: PubMed Central journal article supplement (PMC4566848; doi:10.1186/s13073-015-0218-3), 2015-09-11
Supplement: 13073_2015_218_MOESM15_ESM.pdf [file 13073_2015_218_MOESM15_ESM.pdf]

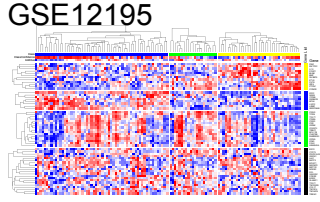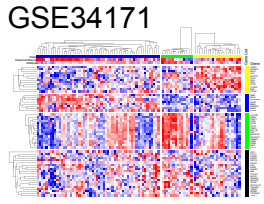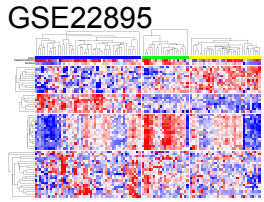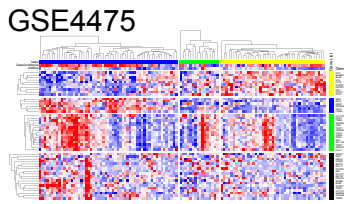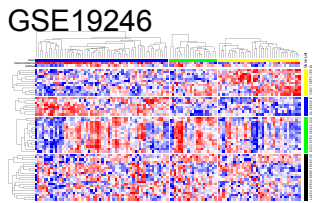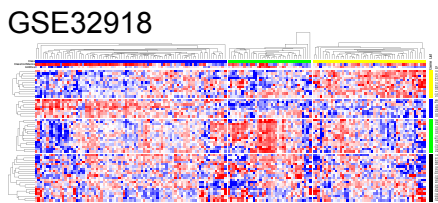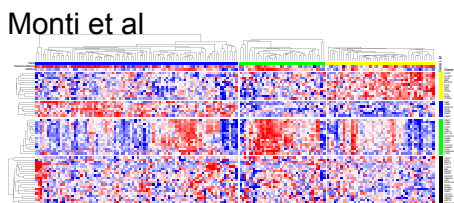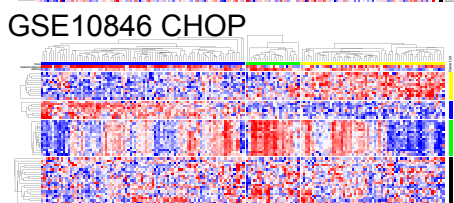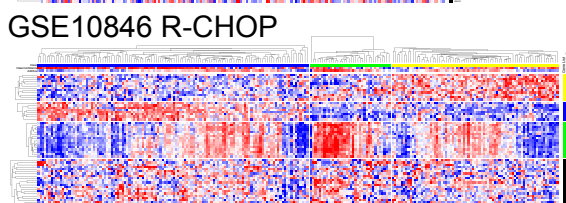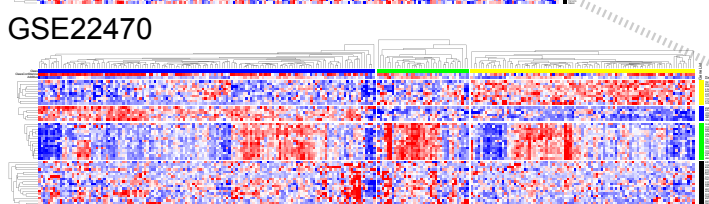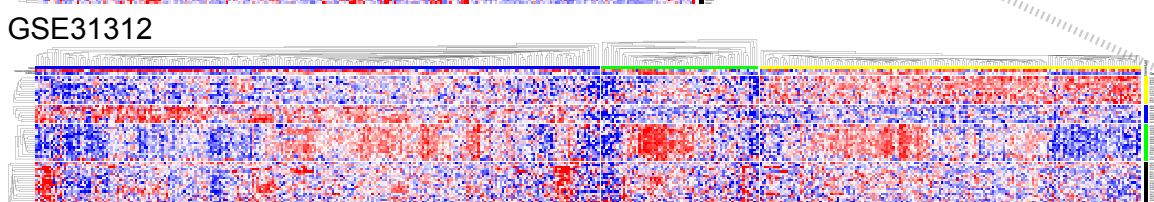

| Gene List | Gene                                                                                                                                                                                             |
|-----------|--------------------------------------------------------------------------------------------------------------------------------------------------------------------------------------------------|
|           | IRF4<br>PIM1<br>FOXP1<br>SH3BP5<br>BLNK<br>IL16<br>BMF<br>ENTPD1<br>FUT8<br>ETV6<br>CCND2<br>PTPN1                                                                                               |
|           | NEK6<br>DENND3<br>LMO2<br>MME<br>SERPINA9<br>BCL6<br>LRMP<br>ITPKB                                                                                                                               |
|           | CLEC2B<br>RARRES3<br>GZMK<br>GZMA<br>IFNG<br>FGL2<br>TRAT1<br>ITM2A<br>CD3G<br>CD3D<br>CD2<br>TRBC1<br>GIMAP6<br>BCL11B<br>UBASH3A<br>TC2N                                                       |
|           | E2F2<br>CCL17<br>NECAP2<br>FCER2<br>MAL<br>MOAP1<br>TNFSF4<br>MST1R<br>QSOX1<br>CD274<br>PDCD1LG2<br>BATF3<br>SAMSN1<br>IL411<br>EGR2<br>SLAMF1<br>NFKB2<br>TRAF1<br>TNFRSF8<br>TNFAIP6<br>TREM1 |
