# Supplementary material for: Gene expression meta-analysis reveals immune response convergence on the IFNγ-STAT1-IRF1 axis and adaptive immune resistance mechanisms in lymphoma
Source: Genome Med. 2015 Sep 11;7(1):96. doi: 10.1186/s13073-015-0218-3 (PMC4566848; doi:10.1186/s13073-015-0218-3)
Supplement: Additional file 12: Table S3. — Ranked list of genes contributing to shared meta-profiles of COO-classified and COO-unclassified DLBCL. (XLSX 38 kb) [file 13073_2015_218_MOESM12_ESM.xlsx]

## Sheet: upCOO-Unclasified
Gene ranks in shared-metaprofiles. 123 (of 127) shared unclassified genes that are present in top 100 Gene Sigs or 100 Gene ontologies.
Headings:
Gene: HGNC gene name (green == T-Cell Additive score genes)
Cluster: Major clusters present in Figure 3B, and 4, from hierarchical clustering of genes based on their presence in gene-signatures/gene-ontologies
NumDataSets^MFC: Number of DLBCL files genes is up-regulated in raised to the Median Normalised Fold (MDF) change
Rank (NumDataSets^MFC): rank when ordered by NumDataSets^MFC
MeanRank: average rank in COO-Unclassified vs COO comparisons
		ABC_upCU		GCB_upCU
Gene	Cluster	NumDataSets^MFC	Rank (NumDataSets^MFC)	NumDataSets^MFC	Rank (NumDataSets^MFC)	MeanRank
TRAT1	1	4.11592	2	3.13151	2	2
CD3D	1	4.42463	1	2.9659	4	2.5
RARRES3	1	3.65461	4	3.2199	1	2.5
CD3G	1	3.90153	3	2.74132	7	5
GZMK	1	3.62398	6	2.73448	8	7
ITM2A	1	3.29511	9	2.79267	6	7.5
GIMAP6	1	2.83215	12	2.82769	5	8.5
CD2	1	3.48692	7	2.65502	12	9.5
CLEC2B	1	3.62672	5	2.53995	15	10
GZMA	1	2.98948	11	2.70022	9	10
TC2N	2	3.36524	8	2.47733	17	12.5
FGL2	2	2.68331	15	2.58443	13	14
IFNG	2	2.51353	21	2.66076	10	15.5
BCL11B	1	2.63871	17	2.45895	19	18
UBASH3A	1	2.38775	25	2.65524	11	18
TRBC1	1	2.73887	13	2.36643	25	19
CCR5	2	2.54967	20	2.32163	27	23.5
GBP1	2	2.182	45	3.06189	3	24
SCML1	2	2.62009	18	2.21369	31	24.5
CD3E	1	2.51177	22	2.21926	30	26
CXCR6	2	2.35247	31	2.39519	23	27
CD28	1	2.33983	33	2.40818	22	27.5
VPS37B	2	2.70081	14	2.10553	43	28.5
GGTA1P	2	2.21995	42	2.53727	16	29
ATP9A	2	2.4537	23	2.17422	35	29
C3AR1	2	2.37792	26	2.21329	32	29
GIMAP8	2	2.29322	36	2.3877	24	30
CST7	1	2.30052	34	2.3248	26	30
CXCL12	2	3.22447	10	1.95136	52	31
GIMAP5	1	2.17541	48	2.57235	14	31
SIRPG	1	2.17703	47	2.46146	18	32.5
MYO1F	2	2.58607	19	2.03038	47	33
STOM	1	2.25973	38	2.2452	28	33
IL32	1	2.67109	16	1.91906	54	35
GATA3	1	2.27933	37	2.21298	33	35
SAMD3	2	2.36051	28	2.08053	44	36
SLC31A2	2	2.36547	27	2.03546	46	36.5
INPP4B	1	2.17874	46	2.23877	29	37.5
PRKCQ	1	2.23748	39	2.13199	39	39
AIF1	2	2.22255	41	2.13081	40	40.5
FYN	1	2.35323	30	1.9585	51	40.5
FAM46A	2	2.34197	32	1.9311	53	42.5
STAT4	1	2.39049	24	1.84934	63	43.5
CERS6	2	1.98219	68	2.43089	20	44
LDLRAP1	1	2.15196	50	2.11137	42	46
LIFR	2	2.0859	58	2.17674	34	46
TYROBP	2	2.08595	57	2.15324	37	47
MAF	1	2.08193	59	2.15373	36	47.5
PLA2G4A	2	1.91379	75	2.4285	21	48
FYB	1	2.12602	53	2.04324	45	49
GIMAP1	1	2.07161	61	2.11373	41	51
TCF7	1	2.35768	29	1.75727	73	51
PECAM1	2	2.14892	51	1.89961	56	53.5
IFITM1	2	2.13518	52	1.8892	57	54.5
NAP1L2	2	2.18443	44	1.80334	65	54.5
UTRN	2	2.11546	54	1.88822	58	56
DDX60L	2	2.03132	64	1.9589	50	57
LCP2	1	2.0946	56	1.88106	59	57.5
TNFRSF25	1	2.10878	55	1.85183	62	58.5
LPAR6	2	2.21443	43	1.68917	83	63
ATXN1	2	2.2966	35	1.61462	93	64
TBXAS1	2	2.22685	40	1.64495	88	64
PLEKHF1	2	1.88208	81	2.02531	48	64.5
GPR65	1	2.15548	49	1.71319	80	64.5
PTPN13	2	2.06921	63	1.78281	68	65.5
XAF1	2	1.98995	67	1.83169	64	65.5
EIF4E3	2	1.89442	77	1.90643	55	66
CASP1	2	1.92028	74	1.86345	60	67
MAN1C1	2	2.02702	65	1.77332	71	68
ARL4C	1	2.07037	62	1.74662	75	68.5
FGR	2	1.84561	88	1.96847	49	68.5
NACC2	2	1.95774	71	1.78779	67	69
DOK2	2	1.69083	104	2.14134	38	71
AAK1	1	1.87933	82	1.85458	61	71.5
CD6	1	2.07716	60	1.67979	84	72
LST1	2	1.9342	72	1.76142	72	72
CPNE8	2	1.97048	69	1.69136	82	75.5
ARRB1	2	1.89072	78	1.74907	74	76
PRR5	2	1.89722	76	1.74002	77	76.5
CXCR3	2	1.82856	89	1.79594	66	77.5
SASH1	2	1.88279	80	1.74459	76	78
TNIK	1	1.96632	70	1.65242	87	78.5
CEBPD	2	1.80123	91	1.77854	70	80.5
RAB27A	2	2.02478	66	1.58258	97	81.5
IL15	1	1.7607	96	1.78262	69	82.5
SAMHD1	2	1.84879	86	1.65377	86	86
SLC8A1	2	1.76322	95	1.73966	78	86.5
TNFRSF1A	2	1.92688	73	1.54482	100	86.5
KLF3	2	1.76327	94	1.70337	81	87.5
CD63	2	1.88694	79	1.56827	98	88.5
TMPRSS3	2	1.86683	84	1.6097	95	89.5
SLFN5	2	1.69901	101	1.73428	79	90
NMT2	2	1.81895	90	1.63284	91	90.5
LPCAT2	2	1.74296	97	1.67197	85	91
OASL	2	1.78021	93	1.61455	94	93.5
ATP2B4	2	1.86312	85	1.49957	107	96
LRRC8C	2	1.69574	102	1.63569	90	96
C1ORF54	2	1.86858	83	1.49664	110	96.5
CCSER2	1	1.78036	92	1.51697	105	98.5
SPG20	2	1.72397	99	1.55153	99	99
SEPW1	2	1.63732	110	1.64202	89	99.5
ARSD	2	1.84619	87	1.47383	113	100
AOAH	2	1.68909	105	1.6038	96	100.5
CPD	2	1.71066	100	1.5344	103	101.5
PPP2R2B	2	1.69508	103	1.51117	106	104.5
LGALS8	1	1.72817	98	1.47258	114	106
FAM105A	2	1.61556	111	1.54289	101	106
DDX58	2	1.47196	123	1.62277	92	107.5
TNFRSF14	2	1.58074	117	1.52739	104	110.5
PRR5L	2	1.66305	107	1.46826	115	111
GALC	2	1.67716	106	1.45345	116	111
SLC35D2	2	1.49456	122	1.54283	102	112
CYLD	1	1.59184	114	1.49176	111	112.5
HLA-E	2	1.57733	119	1.49905	108	113.5
PXYLP1	2	1.58453	116	1.47442	112	114
OSBPL1A	2	1.65855	108	1.37874	121	114.5
RALB	2	1.50742	121	1.49858	109	115
RBMS1	2	1.61282	112	1.4271	119	115.5
DNAJC1	2	1.65158	109	1.37581	122	115.5
NPC1	2	1.60067	113	1.39351	120	116.5
SAT1	2	1.57998	118	1.44338	118	118
WDFY3	2	1.53095	120	1.44869	117	118.5
CALCOCO2	2	1.58608	115	1.37317	123	119

## Sheet: upCOO-Classified
Gene ranks in shared-metaprofiles. 206 (of 209) shared COO-Classified genes that are present in top 100 Gene Sigs or 100 Gene ontologies.
Headings:
Gene: HGNC gene name
Cluster: Major clusters present in hierarchical clustering heatmap
NumDataSets^MFC: Number of DLBCL files genes is up-regulated in raised to the Median Normalised Fold (MDF) change
Rank (NumDataSets^MFC): rank when ordered by NumDataSets^MFC
MeanRank: average rank in COO vs COO-unclassified comparisons
		upABC_CU		upGCB_CU
Gene	Cluster	NumDataSets^MFC	Rank (NumDataSets^MFC)	NumDataSets^MFC	Rank (NumDataSets^MFC)	MedianRank
BCL11A	1	2.90096	5	2.56657	2	3.5
BIK	1	4.77642	1	2.34811	7	4
CD79A	1	2.42273	11	2.4644	4	7.5
GRHPR	1	2.71628	8	2.33921	8	8
MS4A1	1	2.30317	12	2.4348	6	9
FCRLA	1	2.03593	18	2.50603	3	10.5
ST14	1	2.54134	10	2.03207	14	12
BLK	1	2.27523	13	2.06784	13	13
GMDS	1	2.03477	19	2.24204	9	14
ZNF215	1	3.87086	2	1.69364	26	14
CDCA7L	2	2.85268	6	1.72628	23	14.5
IGF2BP3	1	2.66325	9	1.75113	21	15
CD22	1	1.8728	28	2.44111	5	16.5
SPIB	1	3.50433	4	1.64353	31	17.5
LOC100130458	1	2.02059	20	1.87716	17	18.5
OSBPL10	1	1.91918	23	1.92378	16	19.5
POU2AF1	1	2.01368	21	1.85336	19	20
NAPSB	1	2.73921	7	1.62431	35	21
BLNK	1	3.54293	3	1.57317	44	23.5
RALGPS2	1	2.08666	15	1.62392	36	25.5
CTPS2	1	1.78193	41	2.07997	12	26.5
CD37	1	2.08613	16	1.60091	40	28
PAX5	1	2.1202	14	1.58058	43	28.5
MND1	2	1.86136	29	1.65829	30	29.5
BRI3BP	2	1.71557	47	1.96713	15	31
PRKD3	1	1.85271	31	1.62717	33	32
ZNF608	1	1.6483	65	2.64849	1	33
WEE1	2	1.65601	61	2.13662	11	36
PLCG2	1	1.82004	37	1.59767	41	39
GEN1	2	1.99657	22	1.51299	57	39.5
RFC3	2	1.69166	51	1.67237	28	39.5
POU2F2	1	1.90295	24	1.51334	56	40
PXK	1	1.64849	64	1.80807	20	42
SYK	1	1.87351	27	1.50321	58	42.5
E2F8	2	1.82232	36	1.52628	50	43
KIF11	2	1.76784	42	1.54018	48	45
BCL7A	1	1.62404	73	1.87584	18	45.5
RASGRP3	1	1.63589	69	1.74935	22	45.5
E2F5	1	1.6713	56	1.61174	39	47.5
CCDC88A	1	1.69816	50	1.56069	46	48
KBTBD8	1	1.82247	35	1.49367	63	49
CDCA7	2	1.61905	74	1.71444	24	49
CDCA8	2	1.73326	45	1.51986	54	49.5
MPP6	1	1.63623	68	1.62651	34	51
ALDH5A1	1	1.66711	57	1.54597	47	52
CDCA3	2	1.73073	46	1.49706	60	53
SWAP70	1	1.51857	100	2.2381	10	55
CENPI	2	1.58731	84	1.66008	29	56.5
SHCBP1	2	1.71252	48	1.49314	65	56.5
BUB1B	2	1.85271	30	1.42903	84	57
TPX2	2	1.62524	72	1.5964	42	57
CDC45	2	1.83128	32	1.43211	83	57.5
MCM7	2	1.70798	49	1.49057	66	57.5
NUSAP1	2	1.65139	62	1.52011	53	57.5
MCM4	2	1.68249	53	1.49357	64	58.5
RAB30	1	1.89568	25	1.39393	94	59.5
POLQ	2	1.79679	40	1.43429	81	60.5
CDT1	2	1.65017	63	1.49658	61	62
ZNF395	1	1.57803	87	1.61246	38	62.5
NCAPG2	2	1.68024	54	1.45181	75	64.5
FANCA	2	1.54476	93	1.61755	37	65
RAD51AP1	2	1.80341	39	1.39322	96	67.5
HOXA1	1	1.58742	83	1.51392	55	69
PKIG	1	1.60304	78	1.4962	62	70
RMI2	2	1.45098	113	1.67554	27	70
KIF18A	2	1.73499	44	1.37791	101	72.5
TMEM243	1	1.80362	38	1.35562	108	73
KIF18B	2	1.62699	70	1.44959	76	73
ESPL1	2	1.59995	79	1.48796	68	73.5
CXCR5	1	1.8277	33	1.34112	115	74
DHFR	2	1.49498	104	1.53691	49	76.5
PRC1	2	1.82532	34	1.33464	120	77
SHMT2	1	1.6877	52	1.37258	104	78
ACADM	1	1.54903	90	1.4821	69	79.5
HMGA1	2	1.6376	67	1.39815	93	80
BASP1	1	1.40395	136	1.70066	25	80.5
PFAS	1	1.67451	55	1.35993	106	80.5
GINS1	2	1.63805	66	1.3922	97	81.5
NCAPG	2	1.58161	86	1.43901	78	82
KIAA0922	1	1.49215	107	1.50266	59	83
GOT2	1	1.89465	26	1.29321	142	84
ZDHHC23	1	1.44298	117	1.52332	52	84.5
KIF20A	2	1.57318	89	1.43726	80	84.5
BRCA1	2	1.65856	59	1.34946	112	85.5
CCNB1	2	1.58778	82	1.41477	89	85.5
RCCD1	2	1.66257	58	1.3433	113	85.5
TOP2A	2	1.58274	85	1.42015	87	86
CENPU	2	1.48191	108	1.48068	70	89
MSH2	2	1.49287	106	1.46103	72	89
UBE2T	2	1.57612	88	1.40959	91	89.5
TYMS	2	2.07361	17	1.26134	163	90
MCM8	2	1.53036	96	1.42732	85	90.5
NEK2	2	1.51873	99	1.4326	82	90.5
PARP1	1	1.36013	153	1.63859	32	92.5
RPL39L	2	1.60308	77	1.35212	111	94
UHRF1	2	1.52435	98	1.41316	90	94
KNTC1	2	1.61193	75	1.34009	117	96
PAICS	2	1.75658	43	1.26855	160	101.5
TK1	2	1.46508	111	1.40843	92	101.5
GINS3	2	1.50848	101	1.37757	103	102
TFDP1	2	1.4785	109	1.39382	95	102
SPAG5	2	1.54751	91	1.34316	114	102.5
ASF1B	2	1.38946	139	1.47042	71	105
POLA1	2	1.40357	137	1.45413	74	105.5
AURKA	2	1.44962	114	1.38643	99	106.5
RBM38	2	1.33291	163	1.5234	51	107
ZWINT	2	1.6055	76	1.30645	138	107
ATP2A3	1	1.52868	97	1.32626	123	110
SNAPC1	1	1.30526	176	1.56981	45	110.5
KIF2C	2	1.58999	81	1.29951	140	110.5
MKI67	2	1.53659	94	1.32184	127	110.5
DNA2	2	1.62563	71	1.28219	151	111
FEN1	2	1.44712	115	1.35315	110	112.5
HJURP	2	1.41719	127	1.39094	98	112.5
CYB561A3	1	1.4306	122	1.36426	105	113.5
TCL6	1	1.33785	162	1.49034	67	114.5
PFKM	1	1.36273	152	1.43846	79	115.5
KIFC1	2	1.37792	146	1.42598	86	116
TMEM97	1	1.54524	92	1.29052	143	117.5
FIGNL1	2	1.45507	112	1.32116	128	120
KPNA2	2	1.42732	124	1.34055	116	120
SPC25	2	1.49515	103	1.30854	137	120
WDHD1	2	1.47111	110	1.31924	130	120
CASC5	2	1.41149	134	1.35846	107	120.5
TIMELESS	2	1.32879	164	1.44706	77	120.5
SNRPF	1	1.38169	142	1.38639	100	121
MCM3	2	1.42861	123	1.32825	121	122
NCOA3	1	1.41813	126	1.33784	119	122.5
MBD4	2	1.44254	118	1.31845	131	124.5
SS18	2	1.44148	120	1.31195	134	127
HMMR	2	1.41615	130	1.323	126	128
SGOL1	2	1.53279	95	1.26805	161	128
GGA2	1	1.35526	155	1.37777	102	128.5
RUVBL2	1	1.65688	60	1.17943	197	128.5
PRKDC	2	1.41672	128	1.31954	129	128.5
MAP4K2	1	1.31473	172	1.4189	88	130
RPA1	2	1.49456	105	1.27541	155	130
BARD1	2	1.25374	188	1.45933	73	130.5
POLD2	2	1.50705	102	1.26608	162	132
RFC4	2	1.591	80	1.19844	189	134.5
DONSON	2	1.39995	138	1.31734	132	135
TUBG1	2	1.4162	129	1.28896	144	136.5
BTG2	1	1.41256	133	1.29939	141	137
YEATS2	1	1.35244	156	1.32619	124	140
MRPS27	1	1.37913	145	1.30903	136	140.5
CDK2	2	1.3034	177	1.3553	109	143
RFC5	2	1.43676	121	1.24697	167	144
TROAP	2	1.32295	167	1.32702	122	144.5
TMTC4	1	1.44416	116	1.22671	177	146.5
UBE2G1	1	1.34098	160	1.31541	133	146.5
BTK	1	1.38108	143	1.28031	153	148
MIOS	1	1.38408	141	1.27224	156	148.5
PMS2P3	1	1.28866	179	1.33852	118	148.5
CKS1B	2	1.41528	132	1.25776	165	148.5
NUP153	2	1.37536	147	1.28282	150	148.5
DKC1	1	1.44194	119	1.22625	179	149
SMC2	2	1.36992	150	1.28474	149	149.5
CHAF1A	2	1.32708	165	1.3112	135	150
PMS2P1	1	1.35048	157	1.28847	145	151
SSRP1	1	1.40836	135	1.23542	170	152.5
TUBB4B	2	1.36324	151	1.27717	154	152.5
HADH	1	1.34486	159	1.28482	148	153.5
IQCB1	1	1.33956	161	1.28759	146	153.5
ACYP1	2	1.32257	168	1.30628	139	153.5
UBR5	1	1.27714	183	1.32613	125	154
TOPBP1	2	1.4153	131	1.22631	178	154.5
PCNA	2	1.42469	125	1.20199	187	156
SPC24	2	1.35616	154	1.27126	158	156
NONO	1	1.38899	140	1.23082	174	157
RMI1	2	1.37352	149	1.24924	166	157.5
C1ORF112	2	1.38008	144	1.22861	176	160
KLHL42	2	1.29981	178	1.28492	147	162.5
TUBB	2	1.31459	173	1.28059	152	162.5
AHCY	1	1.32111	170	1.27048	159	164.5
PAXIP1	1	1.37495	148	1.20171	188	168
WDR77	1	1.34895	158	1.21903	181	169.5
IARS	1	1.30654	175	1.23057	175	175
CEP57	2	1.26944	186	1.25813	164	175
SLC25A13	1	1.3171	171	1.22233	180	175.5
PMS2P5	1	1.22196	195	1.2718	157	176
STMN1	2	1.28589	180	1.23289	172	176
FTSJ2	1	1.27203	185	1.23229	173	179
RCC1	2	1.32515	166	1.19671	192	179
HN1L	1	1.2332	193	1.23922	169	181
IMPDH2	1	1.30835	174	1.1971	191	182.5
NASP	2	1.32257	169	1.18213	196	182.5
MTF2	2	1.21713	198	1.24093	168	183
NSUN5P2	1	1.21989	196	1.23502	171	183.5
NUDT21	1	1.28386	181	1.19795	190	185.5
MIF	1	1.23995	190	1.20927	184	187
SRSF9	1	1.23536	192	1.20979	183	187.5
EIF3B	1	1.26419	187	1.19143	194	190.5
TRMT6	2	1.27225	184	1.17416	198	191
TEX10	1	1.18417	201	1.20856	185	193
BUB3	2	1.28073	182	1.14163	204	193
CDC7	2	1.23907	191	1.18821	195	193
FUBP1	1	1.1391	206	1.21887	182	194
UPF3A	1	1.17548	204	1.20265	186	195
NAT10	1	1.241	189	1.1461	203	196
SRSF2	2	1.20145	200	1.19324	193	196.5
PPP2R1A	2	1.2186	197	1.17188	199	198
SRSF1	2	1.22646	194	1.14678	202	198
PARP2	2	1.21698	199	1.16993	200	199.5
SNRPB	1	1.17274	205	1.16138	201	203
BTF3	1	1.17991	202	1.10817	206	204
EIF3L	1	1.17803	203	1.13071	205	204
